# Supplementary material for: Fluoxetine targets an allosteric site in the enterovirus 2C AAA+ ATPase and stabilizes a ring-shaped hexameric complex
Source: PubMed Central journal article supplement — Sci Adv. 2022 Jan 5;8(1):eabj7615. doi: 10.1126/sciadv.abj7615 (PMC8730599; doi:10.1126/sciadv.abj7615), 2022-01-05
Supplement: sciadv.abj7615_sm.pdf [file sciadv.abj7615_sm.pdf]

Supplementary Materials for

**Fluoxetine targets an allosteric site in the enterovirus 2C AAA+ ATPase and stabilizes a ring-shaped hexameric complex**

Daniel L. Hurdiss\*, Priscila El Kazzi, Lisa Bauer, Nicolas Papageorgiou, François P. Ferron, Tim Donselaar, Arno L.W. van Vliet, Tatiana M. Shamorkina, Joost Snijder, Bruno Canard, Etienne Decroly, Andrea Brancale, Tzviya Zeev-Ben-Mordehai, Friedrich Förster, Frank J.M. van Kuppeveld\*, Bruno Coutard\*

\*Corresponding author. Email: [d.l.hurdiss@uu.nl](mailto:d.l.hurdiss@uu.nl) (D.L.H.); [f.j.m.vankuppeveld@uu.nl](mailto:f.j.m.vankuppeveld@uu.nl) (F.J.M.v.K.); [bruno.coutard@univ-amu.fr](mailto:bruno.coutard@univ-amu.fr) (B.C.)

Published 5 January 2022, *Sci. Adv.* **8**, eabj7615 (2022)  
DOI: [10.1126/sciadv.abj7615](https://doi.org/10.1126/sciadv.abj7615)

**This PDF file includes:**

Figs. S1 to S19  
Tables S1 to S4

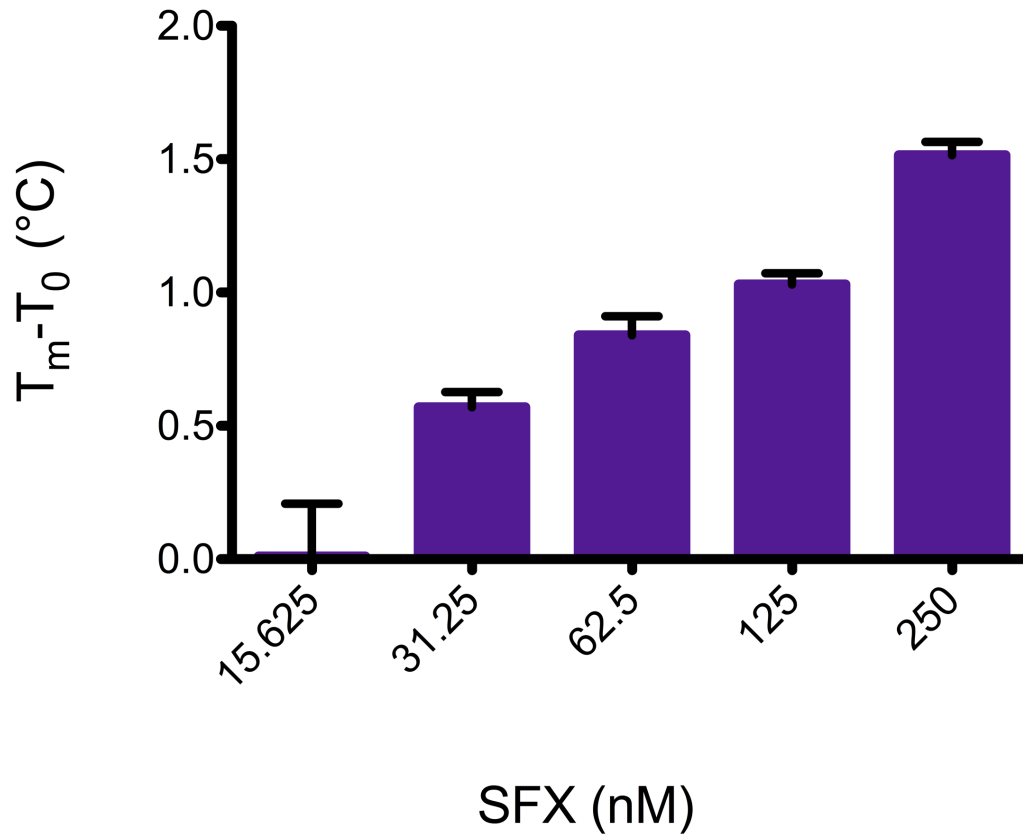

**Figure S1. (S)-Fluoxetine binds to the nonstructural protein 2C *in vitro*.** The binding of SFX to CVB3  $\Delta$ 116-2C was assessed by thermal shift assay. The binding of SFX to  $\Delta$ 116-2C is represented by an increase in melting temperature, which indicates the thermal stabilization of the protein.

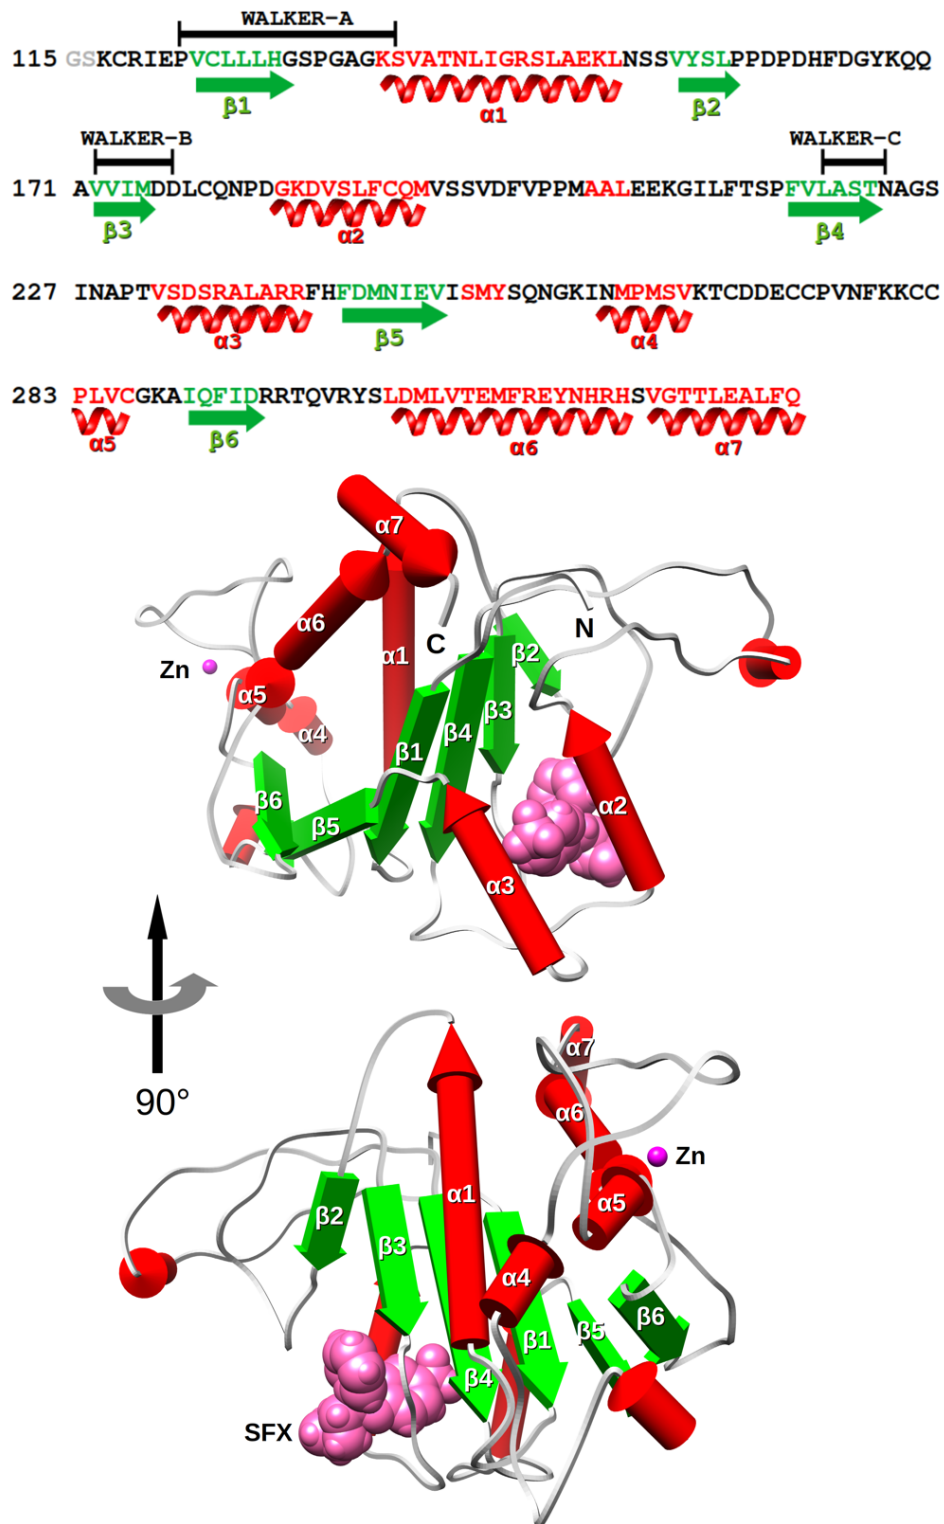

**Figure S2. Annotated sequence and structure of CVB3  $\Delta$ 116-2C.** The fold of CVB3 2C in complex with S-fluoxetine (shown in pink color) is constituted by a Rossman fold core domain prolonged by a sub-4-Cys zinc finger domain and a C-terminal long helix. The  $\beta$ -sheet and  $\alpha$ -helices respectively in green and red color are named accordingly to their position in the structure as depicted in the upper panel of the figure.

EV-A71

|             | 1             | 10          | 20              | 30       | 40      | 50            |
|-------------|---------------|-------------|-----------------|----------|---------|---------------|
| EV-A71      | ..ASWLKFFNDMA | NAAKGLEWIF  | NKISKFIDWLKEKI  | IPAAKEKV | EFLNN   | LKQLPFLLENQ   |
| EV71        | ..ASWLKFFNDMA | SAAKGLEWIS  | NKISKFIDWLKEKI  | IPAAKEKV | EFLNN   | LKQLPFLLENQ   |
| CV-B3       | .NNSWLKFFTEM  | NACKGMEWIA  | VKKIKFIEWLKVIL  | PEVREKH  | EFLNR   | LKQLPFLLESQ   |
| EV-D68      | .SDSWLKFFTEA  | CNALRGLDWLA | QKIDKFINWLKTKIL | PEAREKH  | HEFVQK  | LKQLPFLVIESQ  |
| PV-1        | .GDSWLKFFTEA  | CNAAGLEWV   | NKISKFIDWLKEKI  | IPQARDK  | LEFVTK  | LRQLEMLENQ    |
| HRV-A2      | .NDGWFKFFNDA  | CNAAGLEWIA  | NKISKLEIWKVKVL  | POAKEKL  | EFCSK   | LKQLDILERQ    |
| HRV-B14     | .SDSWLKFFTEA  | CNAAGLEWIG  | NKISKFIEWMKS    | MLPQAKL  | KVLYLN  | LKQLNLYEKQ    |
| EMCV        | ..SPLKQVNDIF  | S LAKNLDWAV | KTVKVVVDVFGTWI  | VQEEKQ   | QT.LDQL | LQRFPEHAKR    |
| Aichi-Virus | ..GLKDFNDGAL  | AMRNVEWIG   | ETAWKWAHRLLDWT  | IRGKAKT  | DPQA    | KLADVHDEIMLH  |
| Hepatitis   | SFSENWLRDICSG | ITIFKNFKDAI | IYWLVTKLKDFY    | EVN      | YGKKDI  | LNLKDNQKIEKAI |

EV-A71

|             | 60               | 70       | 80              | 90        | 100        | 110               |
|-------------|------------------|----------|-----------------|-----------|------------|-------------------|
| EV-A71      | VSN..EESQAASQ    | EDLEAMF  | CNVIYLAHFCR     | ...KFPQ   | PLYATEAKRV | YALEKRMNNY        |
| EV71        | ISN..LEQSAASQ    | EDLEAMF  | CNVSYLAFHFCR    | ...KFPQ   | PLYATEAKRV | YALEKRMNNY        |
| CV-B3       | IAT..IEQSAPSQ    | EDQQLF   | SNVQYFAHYCR     | ...KYA    | PLYATEAKRV | FSALEKRMNNY       |
| EV-D68      | INT..IEHSCPNSE   | XQALFN   | NVQYYSHYCK      | ...KYA    | PLYATEAKRV | FSALEKRMNNY       |
| PV-1        | IST..IHSQCPSE    | QHLEIL   | NNVRWLSIQSK     | ...RFA    | PLYATEAKRI | QKLEHTINNY        |
| HRV-A2      | ITT..MHISNPTQ    | EKRKE    | OLFNNVWLWELQMSQ | ...KFA    | PLYATEAKRI | RELNKRMNNY        |
| HRV-B14     | VES..LRVA..DMKTQ | EKKME    | IDTLHDL         | LSR...KFL | PLYATEAKRI | KTLYIKCDNI        |
| EMCV        | ISD..LRNG..MAAY  | VECKES   | FDFPEKLYN       | ...QAV    | KEKRTGIAAV | CEKFRQKHDH        |
| Aichi-Virus | YSDSILALGSEKLP   | .IDHITKS | ISRCRE          | LVSIQEA   | KSGPHSS    | FLNQAIKNYTLAISQHR |
| Hepatitis   | EADDFCLIQIDV     | EKFEE    | QYQKGVDLIQK     | LRTVHSM   | QVDPNLMV   | HLSPLRDCIARVHQK   |

EV-A71

|             | 120          | 130        | 140             | 150           | 160           |
|-------------|--------------|------------|-----------------|---------------|---------------|
| EV-A71      | QFKSK.....   | HRTEPVCLIR | GSPGTGKSLATGI   | IARAIADKY...  | RSSVYSLPPDP   |
| EV71        | QFKSK.....   | HRTEPVCLIR | GSPGTGKSLATGI   | IARAIADKY...  | RSSVYSLPPDP   |
| CV-B3       | QFKSK.....   | GRTEPVCLLH | GSPGAGKSVATNL   | IARAIADKY...  | RSSVYSLPPDP   |
| EV-D68      | QFKSK.....   | SRTEPVCLLH | GSPGAGKSVATNL   | IARAIADKY...  | RSSVYSLPPDP   |
| PV-1        | QFKSK.....   | HRTEPVCLLH | GSPGAGKSVATNL   | IARAIADKY...  | RSSVYSLPPDP   |
| HRV-A2      | QFKSK.....   | QRTEPVCLLH | GTPGSGKSLTTSI   | VGRAIAEHF...  | NSAVYSLPPDP   |
| HRV-B14     | ..KQK.....   | KRCEPVAVI  | HGPPGAGKSIITNF  | LAKMITN...    | DSDIYSLPPDP   |
| EMCV        | ...AT.....   | ARGEPVVIV  | LRGDAQGGKSLSSQV | IAQAVSKTIFG   | ..RQSVYSLPPDS |
| Aichi-Virus | KCQTG.....   | PREPVVYLY  | GPPGTGKSLLASL   | LAQTLSQLAGT   | PDVYSPSSASCE  |
| Hepatitis   | KNLGSINQAMVT | RCEPVVYLY  | GKRGKSLTSTIA    | LATKICKHYGVEP | EKNITYTKPVASD |

SFX Interaction

AGSINA loop

EV-A71

|             | 170     | 180     | 190     | 200      | 210          | 220        |
|-------------|---------|---------|---------|----------|--------------|------------|
| EV-A71      | HFDGYKQ | QVAVND  | DDLCQNP | DGKDMSTF | CQMVSTVDFVPP | MASLEBKCVS |
| EV71        | HFDGYKQ | QVAVND  | DDLCQNP | DGKDMSTF | CQMVSTVDFVPP | MASLEBKCVS |
| CV-B3       | HFDGYKQ | QAVVIND | DDLCQNP | DGKDMSTF | CQMVSTVDFVPP | MASLEBKCVS |
| EV-D68      | YFDGYKQ | QVAVND  | DDLCQNP | DGKDMSTF | CQMVSTVDFVPP | MASLEBKCVS |
| PV-1        | HFDGYKQ | QVAVND  | DDLCQNP | DGKDMSTF | CQMVSTVDFVPP | MASLEBKCVS |
| HRV-A2      | HFDGYKQ | QVAVND  | DDLCQNP | DGKDMSTF | CQMVSTVDFVPP | MASLEBKCVS |
| HRV-B14     | YFDGYKQ | QVAVND  | DDLCQNP | DGKDMSTF | CQMVSTVDFVPP | MASLEBKCVS |
| EMCV        | YFDGYEN | QFAAIND | DDLCQNP | DGKDMSTF | CQMVSTVDFVPP | MASLEBKCVS |
| Aichi-Virus | YFDGYIG | QVAVND  | DDLCQNP | DGKDMSTF | CQMVSTVDFVPP | MASLEBKCVS |
| Hepatitis   | YWDGYSG | QLVCI   | DDLCQNP | DGKDMSTF | CQMVSTVDFVPP | MASLEBKCVS |

EV-A71

|             | 230         | 240       | 250           | 260       | 270      |
|-------------|-------------|-----------|---------------|-----------|----------|
| EV-A71      | NASNIIVPTVS | DSDAIRRR  | FMDCDIEVT     | DSYKTELGR | LDAGR    |
| EV71        | NASNIIVPTVS | DSDAIRRR  | FMDCDIEVT     | DSYKTELGR | LDAGR    |
| CV-B3       | NAGSINAPTVS | DSRALARR  | FMDNIEVISMYS  | QNGKINMP  | SVKTCDD  |
| EV-D68      | NAGSINAPTVS | DSKALARR  | KFDMEIESMESYK | DGVR      | LDMFKAVE |
| PV-1        | NSRISPTPTVA | HSDALARR  | FMDIDQVMNEYS  | RDGKLN    | MAMATE   |
| HRV-A2      | NSNTLSPPTIL | NPEALVRR  | CFDLDICLHTTYT | KNGKLN    | AGMSTKTC |
| HRV-B14     | NHSLTSPPTIT | SLPAMNRR  | FFLDLDIIVHDN  | PKDP      | QGGKLN   |
| EMCV        | NLPEFREVTIA | HYPVAVRR  | TFDYSV        | SACPVCSKT | EAGYKVL  |
| Aichi-Virus | NHFPNEPNE   | RAARSGAL  | RRVHLRIN      | VTSNGVP   | FDPTNAL  |
| Hepatitis   | NWSNPS      | EKTIVYVKA | ATDRRLH       | FKVEV     | KPA      |

EV-A71

|             | 280  | 290  | 300   | 310   | 320   |
|-------------|------|------|-------|-------|-------|
| EV-A71      | RCSP | LVC  | GKAIQ | LRDRK | SKV   |
| EV71        | RCSP | LVC  | GKAIQ | LRDRK | SKV   |
| CV-B3       | KCCP | LVC  | GKAIQ | LRDRR | TQV   |
| EV-D68      | KCCP | LVC  | GKAIQ | LRDRR | TQV   |
| PV-1        | KCCP | LVC  | GKAIQ | LRDRR | TQV   |
| HRV-A2      | KCCP | LVC  | GKAIQ | LRDRR | TQV   |
| HRV-B14     | KCCP | LVC  | GKAIQ | LRDRR | TQV   |
| EMCV        | NNCL | FLE  | KAGLQ | FRDNR | IKE   |
| Aichi-Virus | SNTV | RLDR | DSI   | ...WT | PTFTN |
| Hepatitis   | MSCV | DLIM | DGH   | ...NV | SLMDL |



**Figure S3. Multiple sequence alignment of 2C proteins of different picornaviruses.** The sequence alignment of EV-A71 (BrCr), CV-B3 (strain Nancy), PV (strain Sabin), EV-D68 (strain Fermon), HRV-A2, HRV-B14, Encephalomyocarditis virus (EMCV), Aichi virus, and Hepatitis A virus was performed with ClustalOMEGA(52). The alignment was subjected to the ESPript 3.0 server(53). Conserved residues are highlighted in red with white letters. Highly conserved residues are highlighted in red letters. Secondary structural elements are shown on top of the alignment and are based on the EV-A71 crystal structure (PDB: 5GRB). Sea green Boxes indicate interaction residues with (S)-fluooxetine. The orange box indicates the AGSINA loop at the positions 224-229 in which SFX resistance mutations occur.

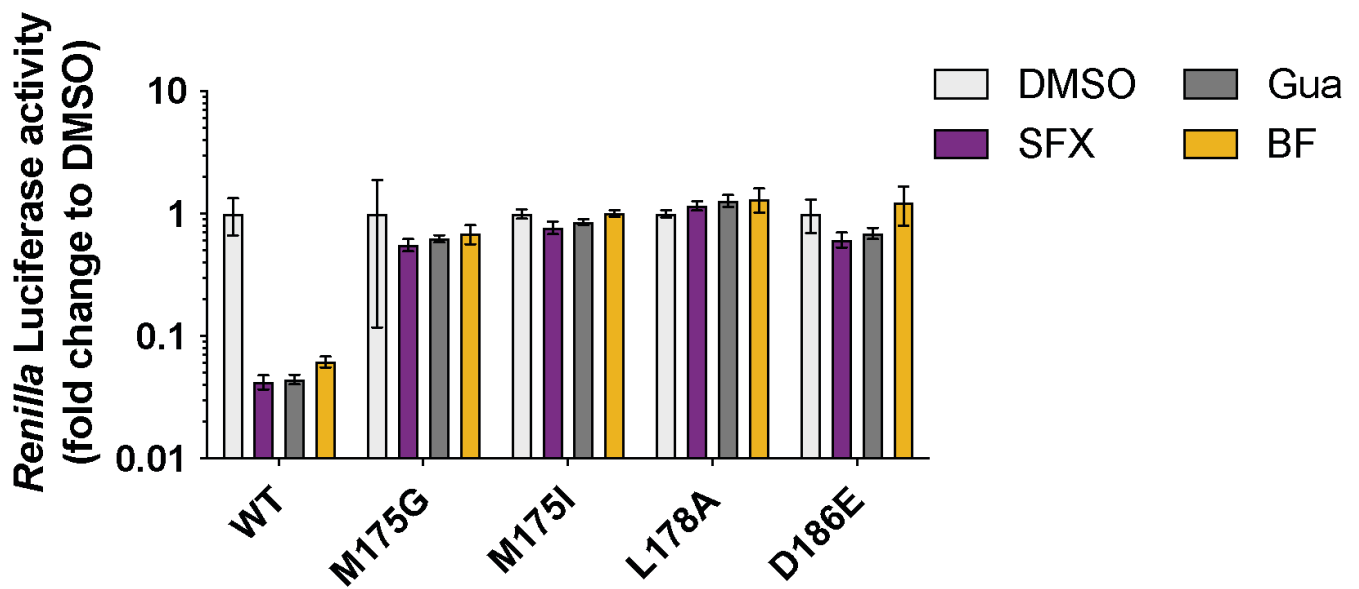

**Figure S4. Introduction of less stringent mutations in CV-B3 2C cannot rescue CV-B3 replication.** (A) Less stringent mutations were introduced into a recombinant CV-B3 virus encoding a Renilla luciferase reporter gene (Rluc-CV-B3) upstream of the capsid coding region. Infectious RNA was transfected into cells and *Renilla* luciferase was used as a sensitive and quantitative read-out for virus replication.

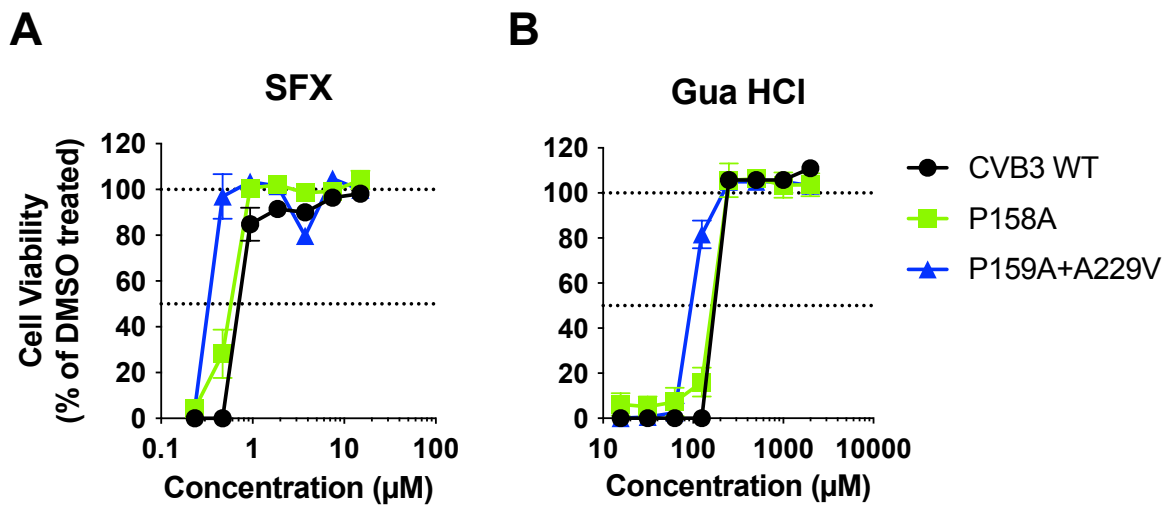

**Figure S5. Resistance profile of viable 2C mutations of CV-B3.** Viruses with several 2C mutations were tested for their sensitivity against (A) SFX or (B) GuaHCl in a multicycle replication assay. The experimental data displayed represent one out of three independent experiments which were performed in biological triplicates.

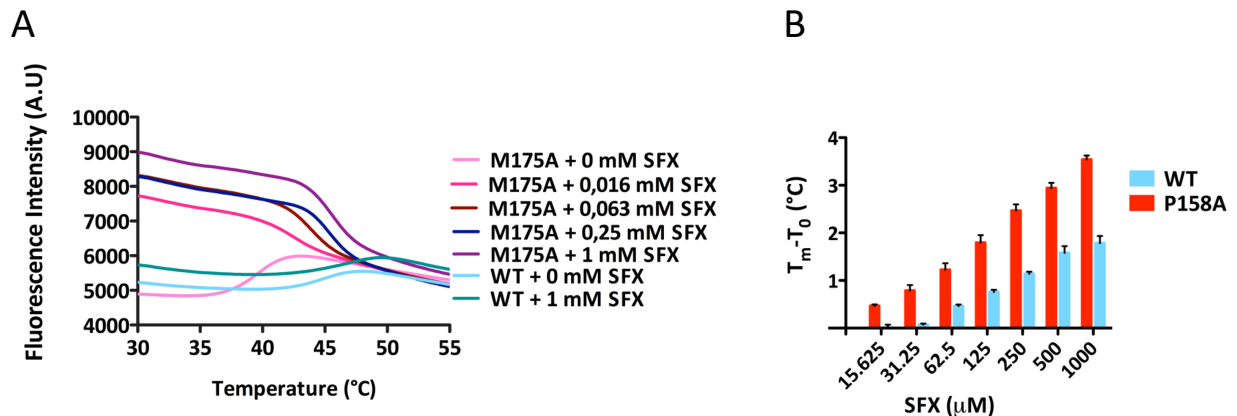

**Figure S6. Thermal shift analysis of the M175A and P158A mutants.** The capacity of SFX to interact with the  $\Delta 116$ -2C mutants was assessed by thermal shift assay. A positive shift of the melting temperature is a sign of thermal stabilization of the protein resulting from an eventual binding with the SFX. A) Representation of M175A and WT (control) melting curves in the absence and presence of SFX. B) Thermal stabilization of WT and P158A by SFX is represented by an increase in the melting temperature ( $T_m - T_0$ ).

**A**

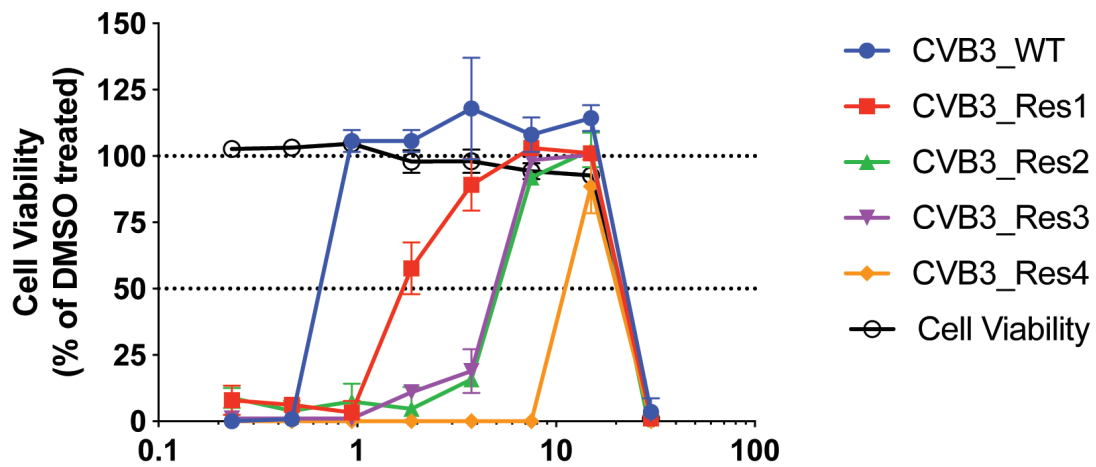

**B**

Resistant Virus Genotypes

| CVB3          | Genotype 2C         | SFX ( $\mu\text{M}$ ) | Fold |
|---------------|---------------------|-----------------------|------|
| CVB3-WT       | WT                  | $0,62 \pm 0,06$       | 1    |
| CVB3 SFX-Res1 | I227V               | $2,31 \pm 0,16$       | 4    |
| CVB3 SFX-Res2 | I227V, A229V        | $4,90 \pm 0,25$       | 8    |
| CVB3 SFX-Res3 | I227V, A229V        | $4,94 \pm 0,05$       | 8    |
| CVB3 SFX-Res4 | A224V, I227V, A229V | $8,67 \pm 0,68$       | 14   |

**Figure S7. Raising SFX-resistant CVB3 viruses.** CV-B3 viruses resistant to S-fluoxetine (SFX) were raised in a multistep protocol as described previously(26). (A) Multicycle viral replication assay was performed to determine SFX sensitivity of CV-B3 viruses resistant to SFX. Therefore, HeLa R19 cells were treated with serial dilutions of SFX and infected with an MOI of 0.001 After 3 days, the cells' viability was determined using an MTS assay. (B) Genotypes of 2C of the raised resistant CV-B3 viruses are shown

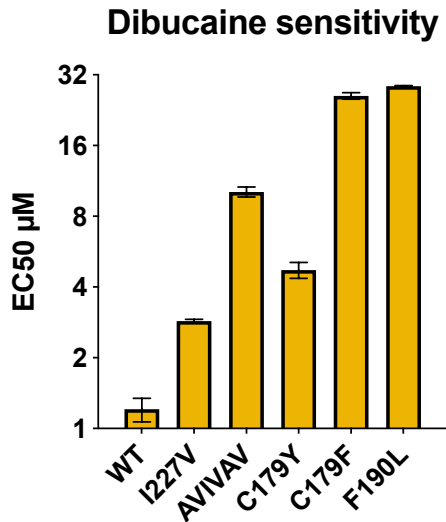

**Figure S8. 2C mutations providing resistance to SFX are cross-resistance to dibucaine.** Rluc CV-B3 reporter viruses containing previously identified mutations in the nonstructural protein 2C conferring resistance to several identified 2C inhibitors were used in a single cycle assay. HeLaR19 cells were infected with an MOI 0.1 of Rluc-CV-B3 WT, the I227V mutant, the triple mutant A224V-I227V-A229V (designated AVIVAV), the C179Y of C179F mutant and the F190L mutant. One hour after infection, the cells were treated with a serial dilution of dibucaine. The 50% effective concentration EC<sub>50</sub> values displayed are calculated from three independent experiments which were performed in biological triplicates.

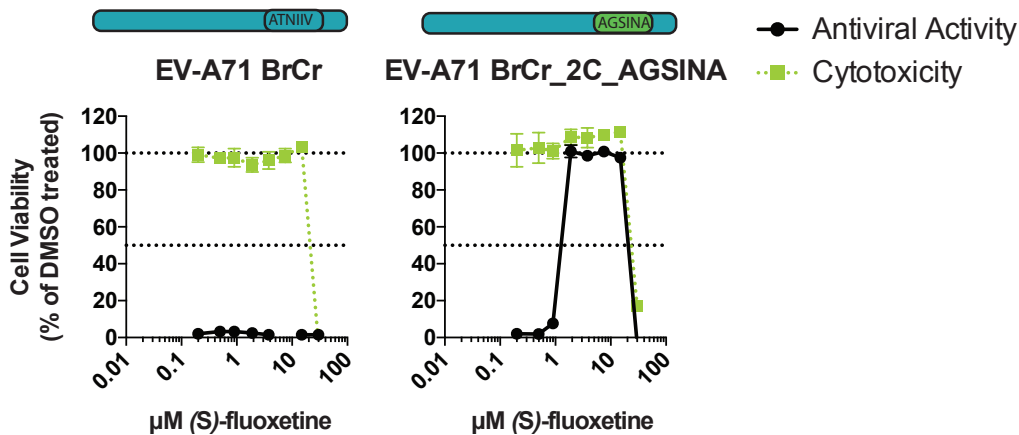

**Figure S9. Introduction of 224-AGSINA-229 into the infectious clone of EV-A71 results in SFX sensitivity.** The 224-AGSINA-229 loop was introduced into the 2C protein of the SFX-insensitive EV-A71 BrCr strain with reverse genetics. The obtained virus was used to determine the SFX-sensitivity in a multicycle assay. In parallel, the cytotoxicity of SFX was determined with a cell viability assay. The experimental data display represents one out of three independent experiments which were performed in biological triplicates.

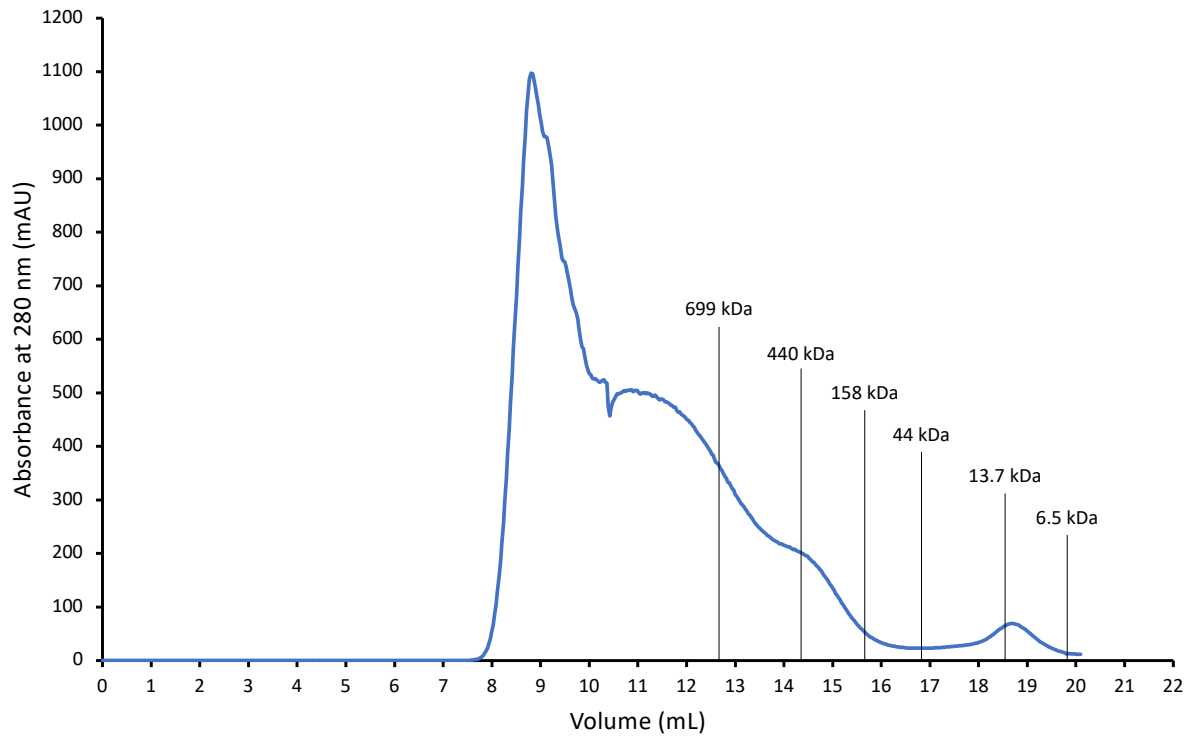

**Figure S10: Purification of MBP-tagged full-length CV-B2 2C protein.** Size Exclusion Chromatogram for the MBP-tagged full length 2C protein. Elution of the putative hexamer is expected between 14 and 16 mL. The elution volume for molecular weight standards are indicated.

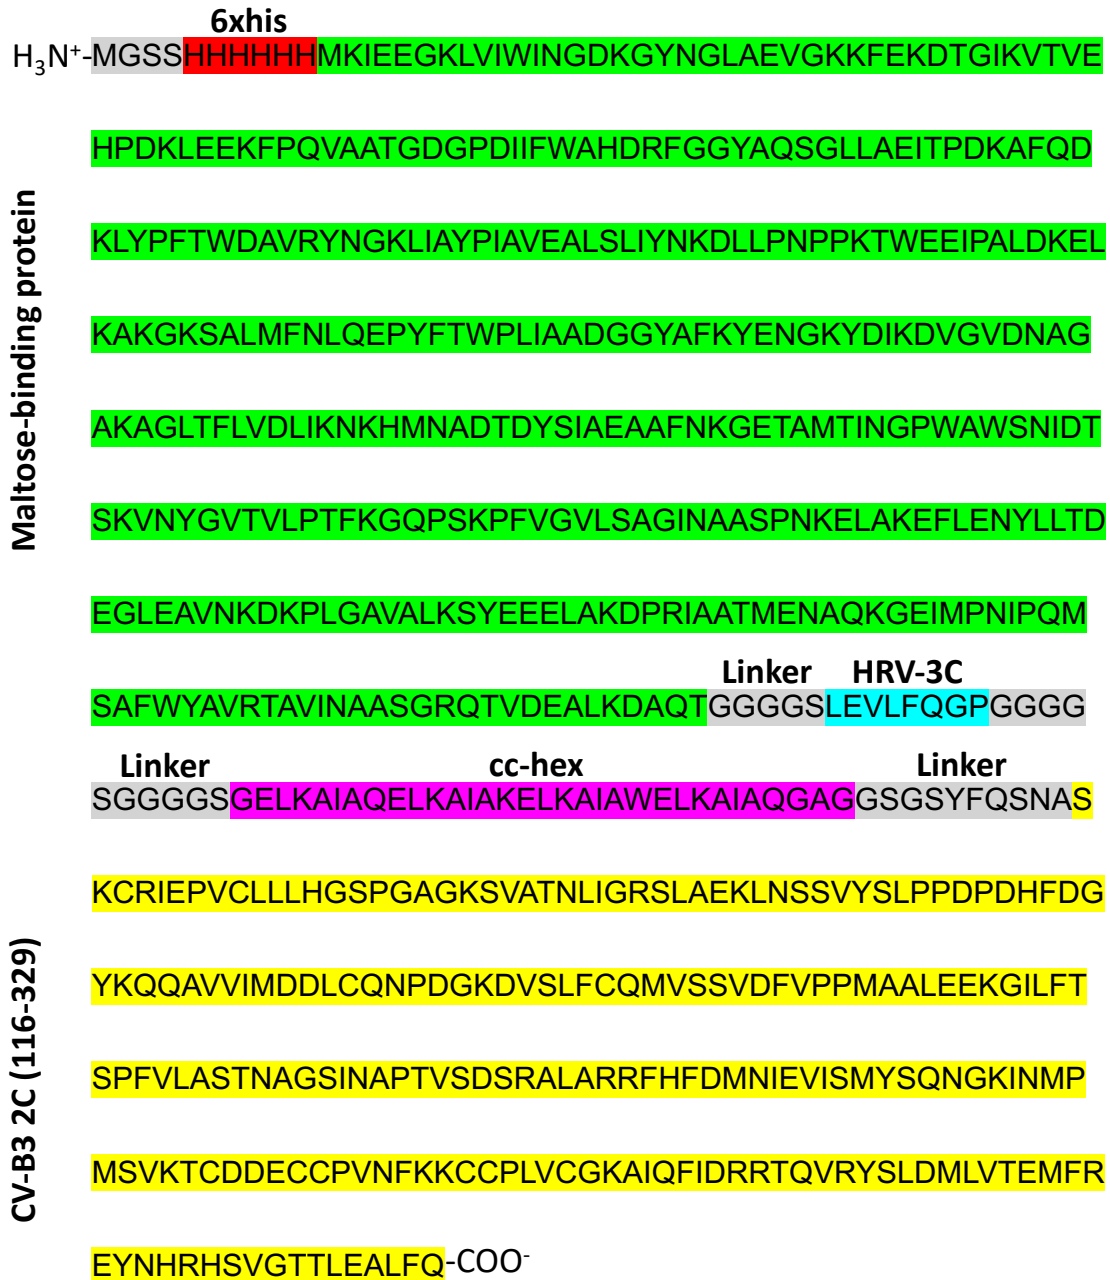

**Figure S11: Overview of the hexΔ116 CV-B3 2C protein expression construct.** Amino acid sequence of the hexΔ116-2C construct showing the positions of the 6xhis tag (red), MBP (green), HRV-3C protease cleavage site (blue), linker (grey), cc-hex-D24 sequence (purple) and residues 116-329 of CV-B3 2C (yellow).

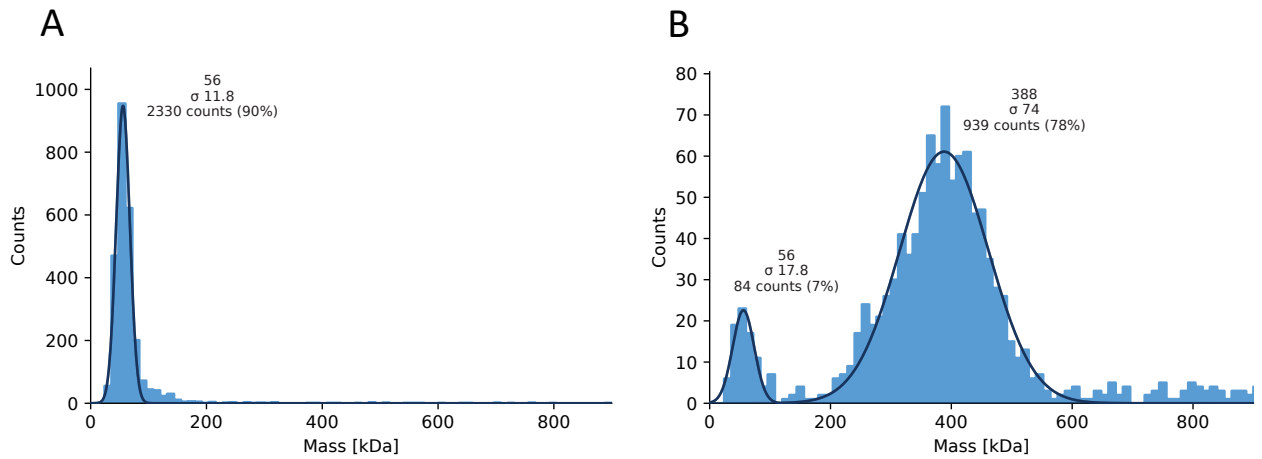

**Figure S12. Mass photometry analysis of the monomeric and hexameric 2C constructs.** (A) Molecular mass distribution histogram of the MBP tagged monomeric  $\Delta 116$ -2C and (B) hex $\Delta 116$ -2C. The solid lines represent major species that fit with Gaussian functions.

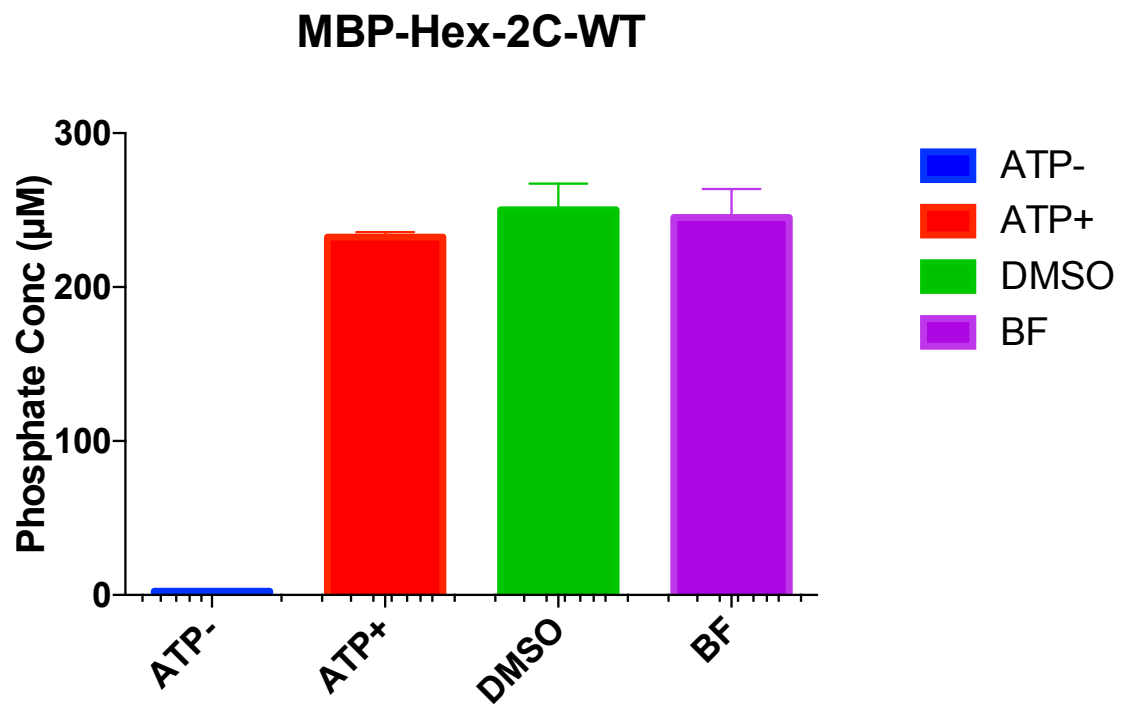

**Figure S13. Controls for the ATPase assay.** ATPase activity for the WT hex $\Delta 116$ -2C with or without ATP added, and in the presence of DMSO or a non-2C targeting compound, BF.



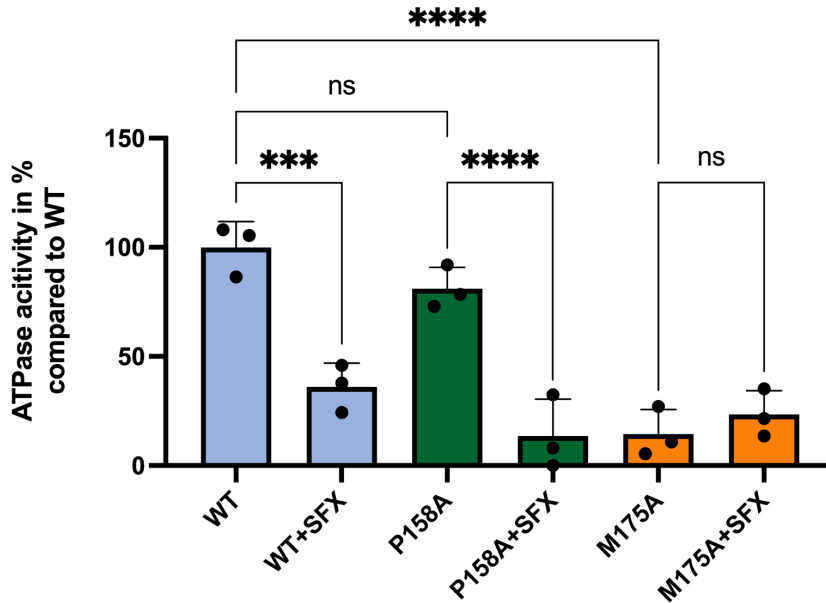

**Figure S14. Assessing the effect of SFX binding site mutations on ATP hydrolysis.** ATPase activity for the WT, P158A or M175A hex $\Delta$ 116-2C, with or without SFX added. A representative result of two experiments is shown, each performed in technical triplicates. The data were analyzed by the unpaired, two-tailed Student's t test using GraphPad Prism 8.0. (\*\*P < 0.0002, \*\*\*\*P < 0.0001).

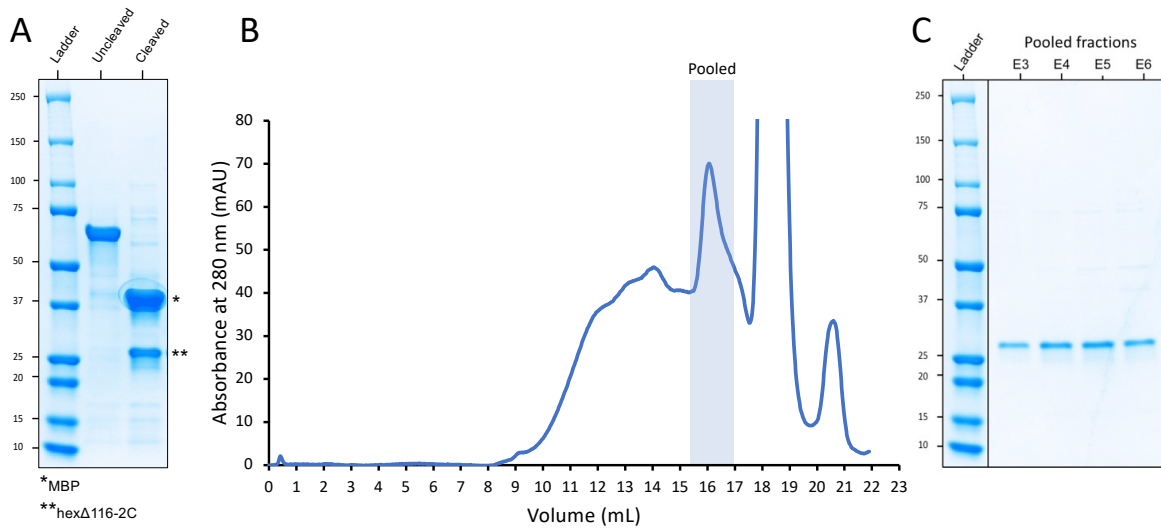

**Figure S15: Purification of the hex $\Delta$ 116 CV-B3 2C protein following removal of the MBP tag.** A) Coomassie blue-stained SDS-PAGE analysis of the hex $\Delta$ 116-2C construct before and after 3C protease cleavage. B) Size Exclusion chromatogram of the hex $\Delta$ 116-2C after removal of the MBP tag, with the pooled fractions indicated. C) Coomassie blue-stained SDS-PAGE analysis of pooled fractions.

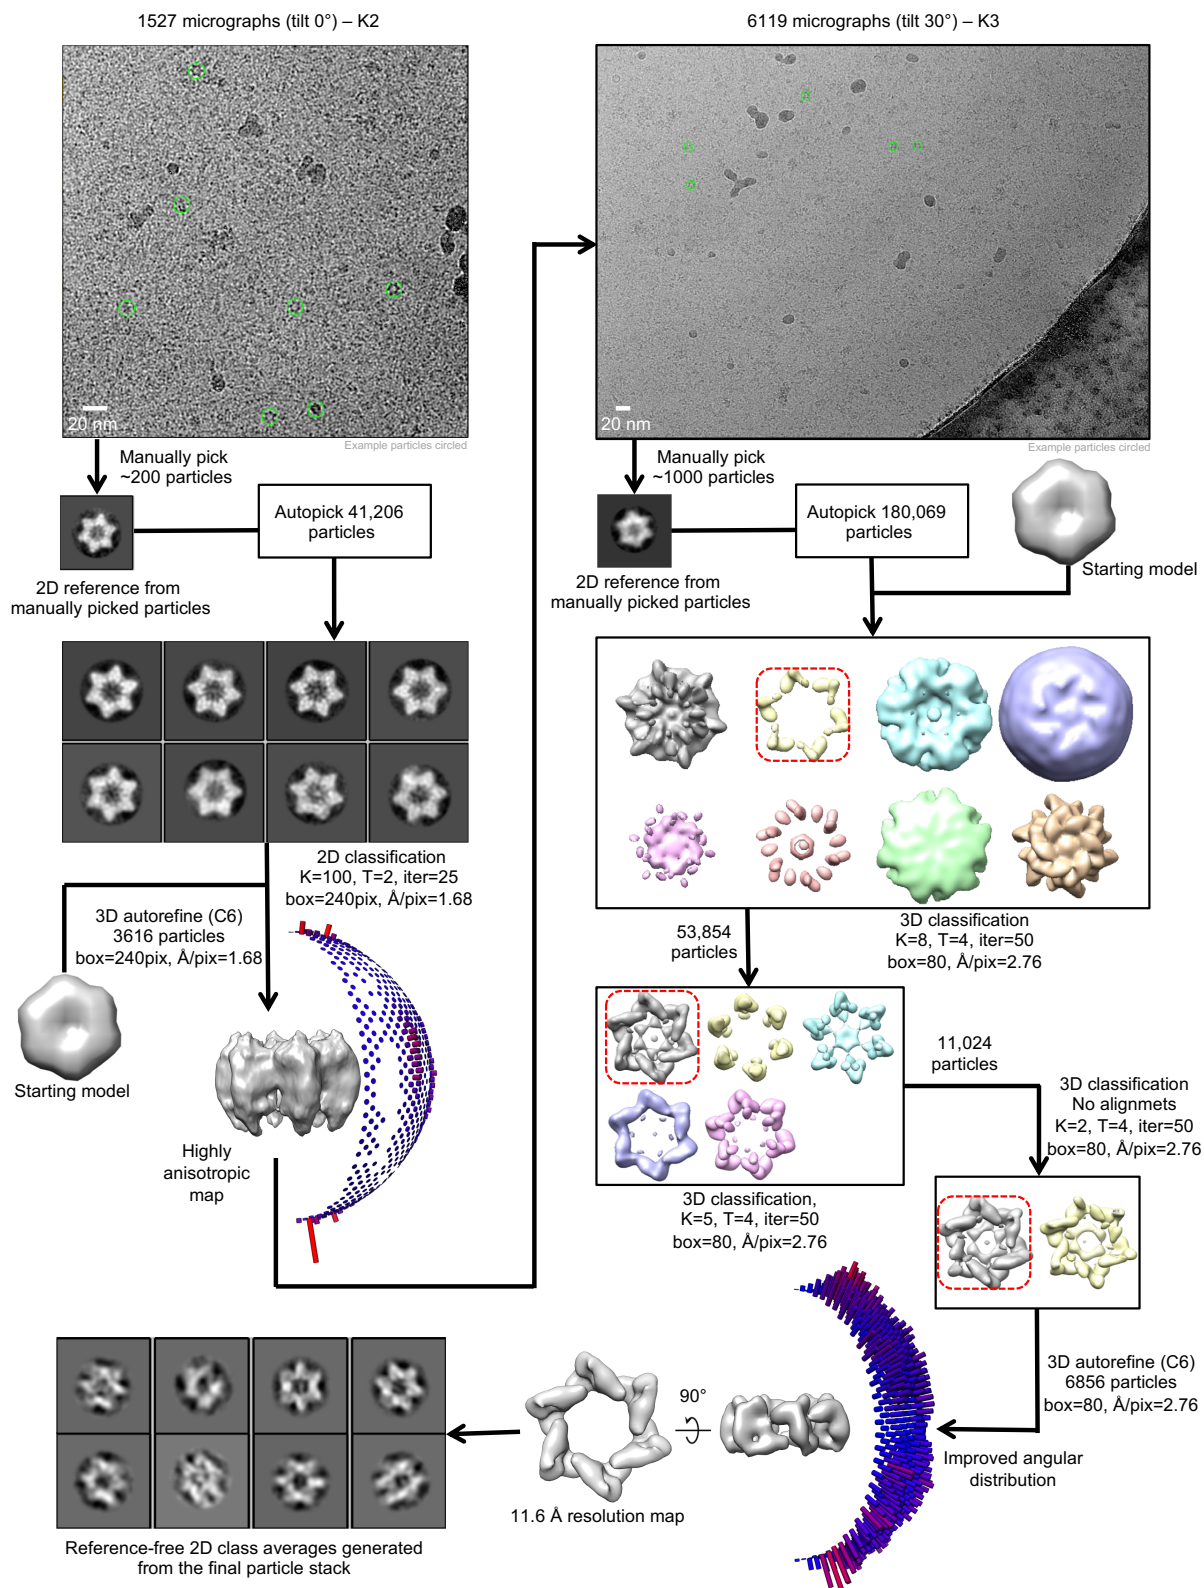

**Figure S16: Cryo-EM processing pipeline for hexΔ116 CV-B3 2C incubated with SFX.** Single-particle cryo-EM image processing workflow for hexΔ116-2C incubated with SFX (see methods for details).

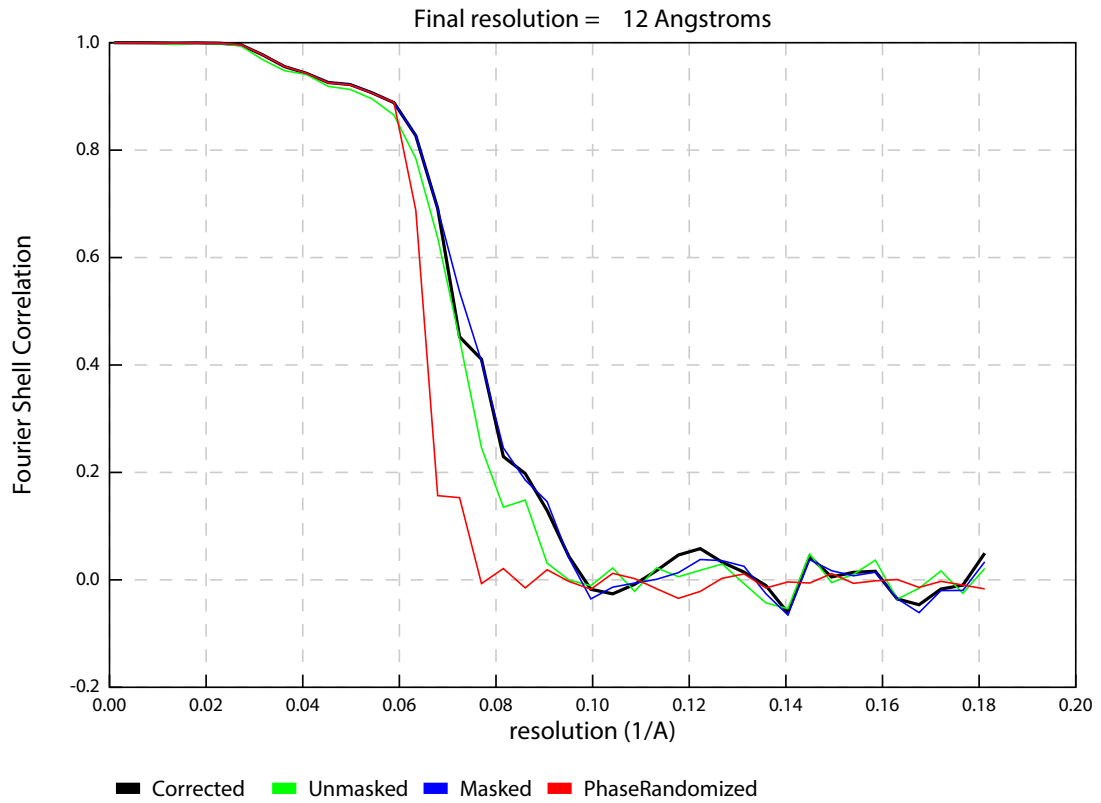

**Figure S17: Estimated resolution for the hexΔ116 CV-B3 2C cryo-EM reconstruction.** A) Gold-standard Fourier shell correlation (FSC) curve generated from the independent half maps contributing to the ~12 Å resolution density map.

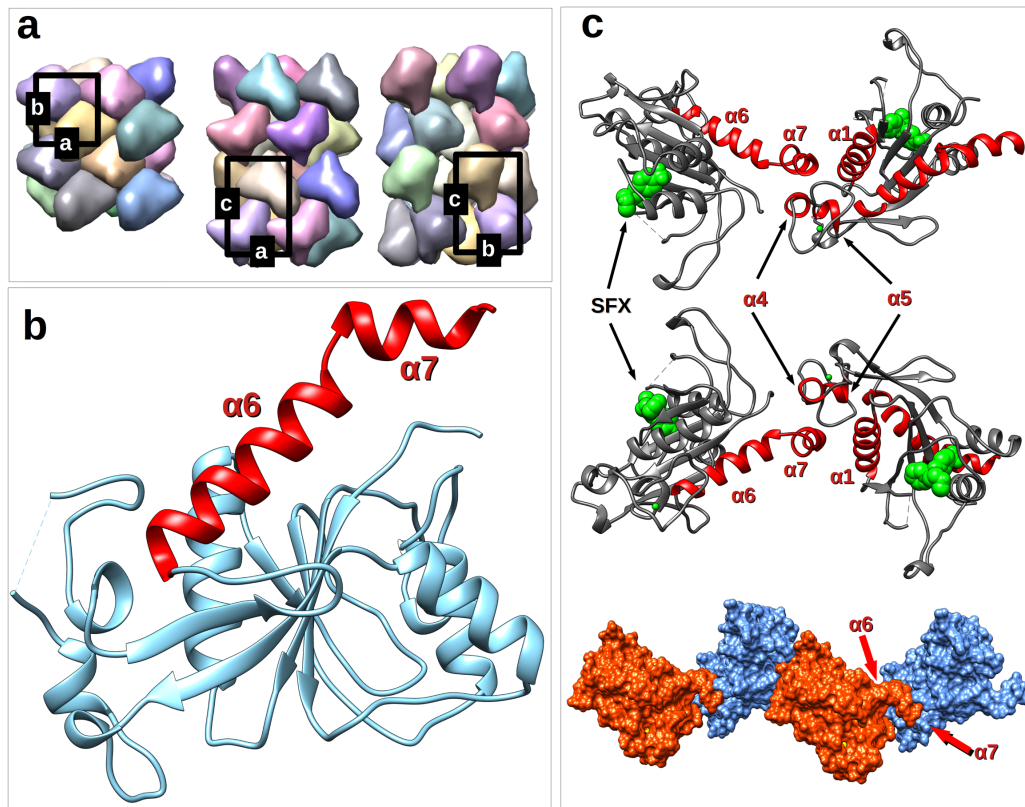

**Figure S18: Crystal packing of  $\Delta 116$  CV-B3 2C in complex with SFX.** A) Crystal packing of the SFX-bound  $\Delta 116$  CV-B3 2C structures reported here. B) Ribbon diagram of the  $\Delta 116$  CV-B3 2C structure. The C-terminal  $\alpha 6$  and  $\alpha 7$  helices, believed to be involved in oligomerization, are colored red. C) Crystal contacts between symmetry related, SFX-bound  $\Delta 116$  CV-B3 2C molecules showing the affinity of the C-terminal  $\alpha 7$  helix towards the Zn binding site region of neighboring molecules within the crystal.

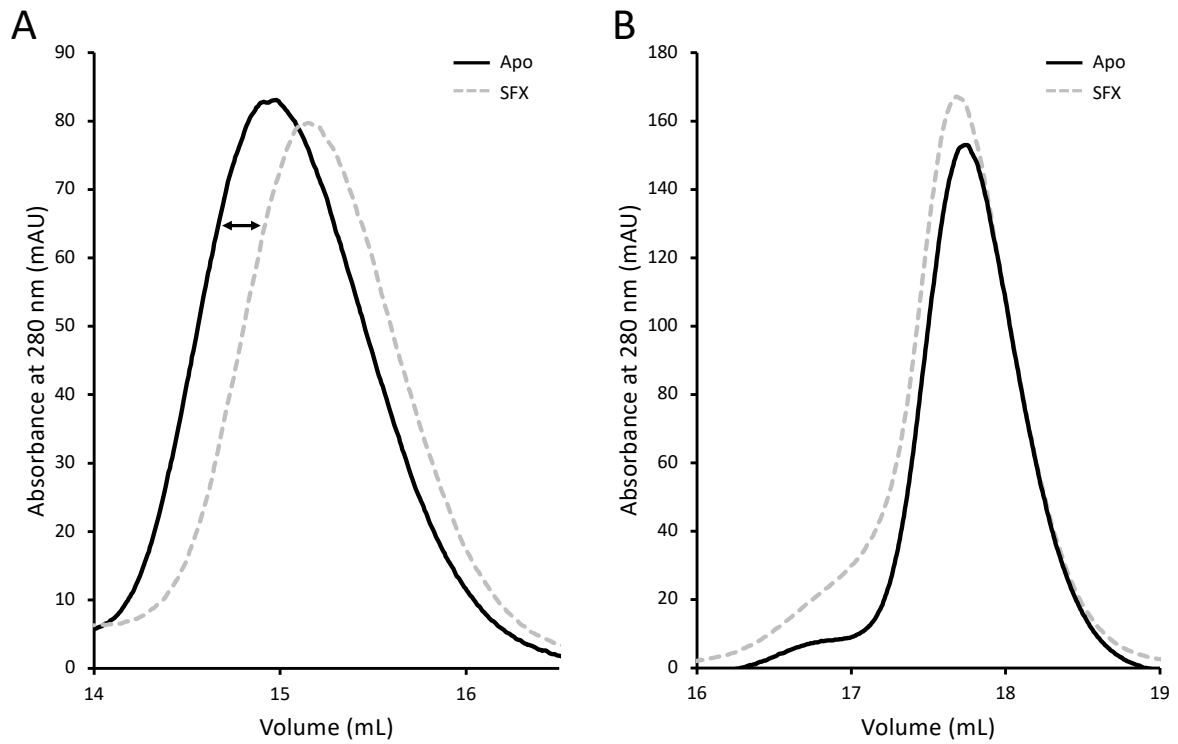

**Figure S19: Purification of hex $\Delta$ 116 CV-B3 2C in the presence or absence of SFX.** Size Exclusion Chromatogram for the MBP-tagged hex116-2C protein in the presence or absence of 30  $\mu$ M SFX. As shown in (A) for the monomeric MBP-tagged 116-2C protein.

**Table S1: Data collection and refinement statistics.** Statistics for the highest-resolution shell are shown in parentheses

|                                | 5S3A                        | 6T3W                        |
|--------------------------------|-----------------------------|-----------------------------|
| Wavelength                     | 0,98                        | 0,98                        |
| Resolution range               | 44.14 - 1.52 (1.574 - 1.52) | 39.68 - 1.82 (1.885 - 1.82) |
| Space group                    | P 21 21 21                  | P 21 21 21                  |
| Unit cell                      | 48.40 53.18 79.15 90 90 90  | 47.99 53.00 79.37 90 90 90  |
| Total reflections              | 178322 (17165)              | 230223 (17203)              |
| Unique reflections             | 32092 (3154)                | 18771 (1846)                |
| Multiplicity                   | 5.6 (5.4)                   | 12.3 (9.3)                  |
| Completeness (%)               | 98.18 (94.87)               | 99.97 (100.00)              |
| Mean I/sigma(I)                | 13.69 (1.89)                | 21.73 (2.16)                |
| Wilson B-factor                | 16.39                       | 29.35                       |
| R-merge                        | 0.07018 (0.8355)            | 0.06223 (0.8174)            |
| R-meas                         | 0.07759 (0.9264)            | 0.06496 (0.8656)            |
| R-pim                          | 0.0326 (0.3955)             | 0.01838 (0.2818)            |
| CC1/2                          | 0.999 (0.646)               | 1 (0.798)                   |
| CC*                            | 1 (0.886)                   | 1 (0.942)                   |
| Reflections used in refinement | 31556 (2994)                | 18768 (1846)                |
| Reflections used for R-free    | 1889 (174)                  | 1878 (185)                  |
| R-work                         | 0.1853 (0.2538)             | 0.1984 (0.2740)             |
| R-free                         | 0.1995 (0.2579)             | 0.2128 (0.3030)             |
| CC(work)                       | 0.959 (0.800)               | 0.954 (0.789)               |
| CC(free)                       | 0.952 (0.798)               | 0.945 (0.730)               |
| Number of non-hydrogen atoms   | 1873                        | 1739                        |
| macromolecules                 | 1623                        | 1620                        |
| ligands                        | 24                          | 45                          |
| solvent                        | 226                         | 74                          |
| Protein residues               | 210                         | 208                         |





**Table S3 Primers list for 2C site directed mutagenesis.** Changed bases are indicated in lower cases.

| 2C mutations |     | 5'-3' sequence                 |
|--------------|-----|--------------------------------|
| L157A        | FWD | AGTGTACTCAgcaCCGCCAGACC        |
|              | REV | GAGCTGTTGAGTTTCTCAG            |
| P158A        | FWD | GTA CTCACTAgcgCCAGACCCAG       |
|              | REV | ACTGAGCTGTTGAGTTTCTCAGC        |
| P159A        | FWD | CTCACTACCGgcaGACCCAGATC        |
|              | REV | TACTGAGCTGTTGAGTTTCTC          |
| M175A        | FWD | CGTGGTGATTgcgGACGATCTATGC      |
|              | REV | GCCTGCTGTTTGTATCCG             |
| M175G        | FWD | CGTGGTGATTgggGACGATCTATGC      |
|              | REV | GCCTGCTGTTTGTATCCG             |
| M175I        | FWD | CGTGGTGATTattGACGATCTATGC      |
|              | REV | GCCTGCTGTTTGTATCCG             |
| D176A        | FWD | GGTGATTATGgccGATCTATGCC        |
|              | REV | ACGGCCTGCTGTTTGTAT             |
| D176N        | FWD | GGTGATTATGaacGATCTATGC         |
|              | REV | ACGGCCTGCTGTTTGTAT             |
| L178A        | FWD | TATGGACGATgcaTGCCAGAATCCTGATG  |
|              | REV | ATCACCACGGCCTGCTGT             |
| L178I        | FWD | TATGGACGATattTGCCAGAATCCTGATGG |
|              | REV | ATCACCACGGCCTGCTGT             |
| P182A        | FWD | ATGCCAGAATgccGATGGGAAAG        |
|              | REV | AGATCGTCCATAATCACC             |
| D186A        | FWD | TGATGGGAAAgccGTCTCCTTGT        |
|              | REV | GGATTCTGGCATAGATCG             |
| D186E        | FWD | TGATGGGAAAgagGTCTCCTTGT        |
|              | REV | GGATTCTGGCATAGATCG             |
| D186N        | FWD | TGATGGGAAAaacGTCTCCTTGT        |
|              | REV | GGATTCTGGCATAGATCGTC           |
| A229V        | FWD | ATCTATTAATgttCCAACCGTGTCAG     |
|              | REV | CCTGCATTGGTCGATGCC             |

**Table S4: Cryo-EM data collection and image processing**

| Hex116-2C + SFX        |          |                  |
|------------------------|----------|------------------|
| <b>Data Collection</b> |          |                  |
| Camera                 | K2       | K3               |
| Detector mode          | Counting | Super resolution |
| Movies collected       | 1527     | 6119             |
| Magnification          | 165 000  | 64 000           |

|                                        |         |         |
|----------------------------------------|---------|---------|
| Voltage (kV)                           | 300     | 300     |
| Stage tilt (°)                         | 0       | 30      |
| Electron exposure (e-/Å <sup>2</sup> ) | 50      | 54      |
| Defocus range (μm)                     | 1.5-2.5 | 2-4     |
| Pixel size (Å)                         | 0.84    | 0.69    |
| <b>Image processing</b>                |         |         |
| Pixel size (Å)                         | 1.68    | 2.76    |
| Symmetry imposed                       | C6      | C6      |
| Initial particle images (no.)          | 41 206  | 180 069 |
| Final particle images (no.)            | 3616    | 6856    |
| Map resolution (Å)                     | N/A     | 12      |
| FSC threshold                          | N/A     | 0.143   |
